# Supplementary material for: Immune cell characteristics and cytokine responses in adult HIV-negative tuberculous meningitis: an observational cohort study
Source: PubMed Central journal article supplement (PMC6351535; doi:10.1038/s41598-018-36696-3), 2019-01-29
Supplement: 41598_2018_36696_MOESM1_ESM.pdf [file 41598_2018_36696_MOESM1_ESM.pdf]

Supplementary figures to

***“Immune cell characteristics and cytokine responses in adult HIV-negative  
tuberculous meningitis: an observational cohort study”***

Arjan van Laarhoven, Sofiati Dian, Suzanne van Dorp, Feby Purnama, Valerie ACM Koeken,  
Emira Diandini, Fitria Utami, Resvi Livia, Lika Apriani, Edwin Ardiansyah, Rob ter Horst,  
Mihai G Netea, Tri Hanggono Achmad, Philip C Hill, Rovina Ruslami, Bachtu Alisjahbana,  
James E Ussher, Agnes Indrati, Ayesha Verrall, Ahmad Rizal Ganiem, Reinout van Crevel

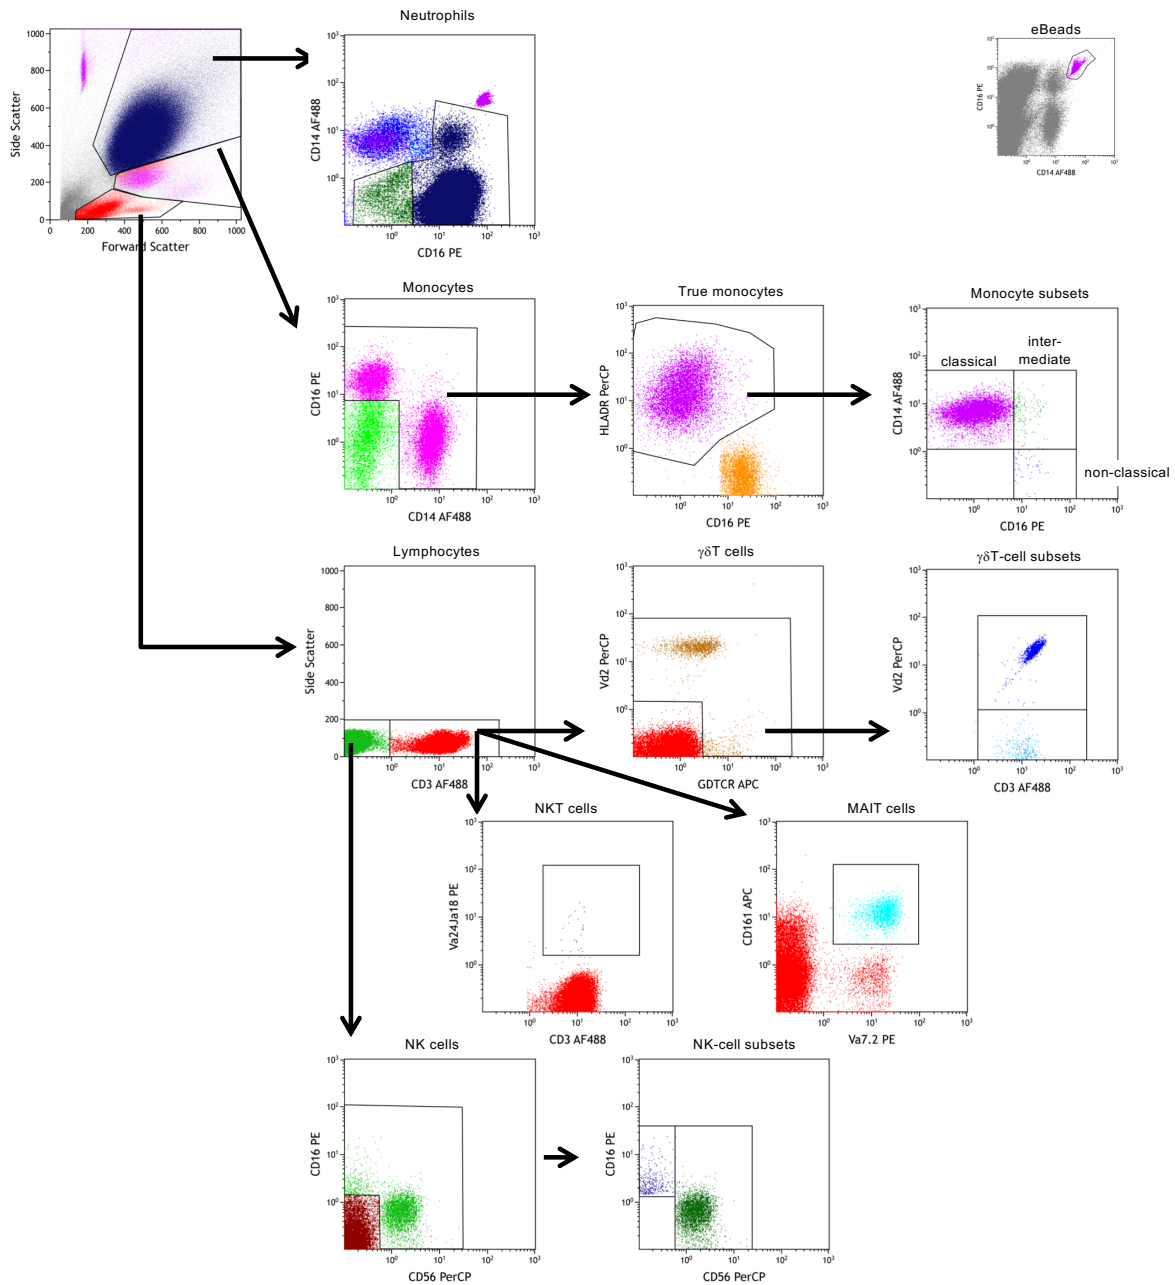

**Supplementary figure 1 (A)** flow cytometry gating strategy.  $\alpha\beta$ T cells are calculated by subtracting NKT cells,  $\gamma\delta$ T cells and MAIT cells from the total number of CD3<sup>+</sup> lymphocytes.

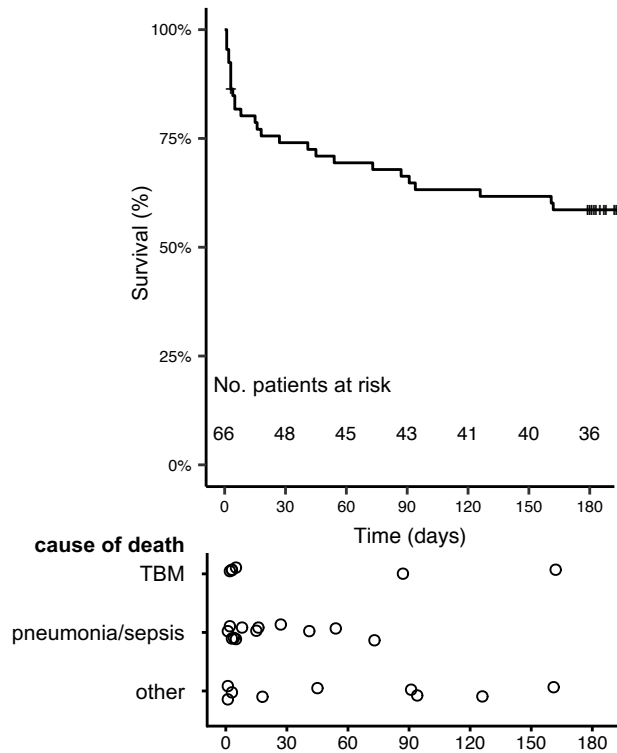

(B) Mortality of tuberculous meningitis patients in the first 180 days of follow-up. Outcome data were missing for one patient. Presumptive cause of death is depicted below the Kaplan-Meier graph in three categories: 1) tuberculous meningitis-related causes: 4 because of increased intracranial pressure, 2 because of a paradoxical reaction, 2) pneumonia (8) or sepsis (4), and 3) miscellaneous: 3 aspiration pneumonia, 3 suspected cardiac arrest or pulmonary embolism, 1 head injury, 1 metabolic encephalopathy and 1 with unknown cause.

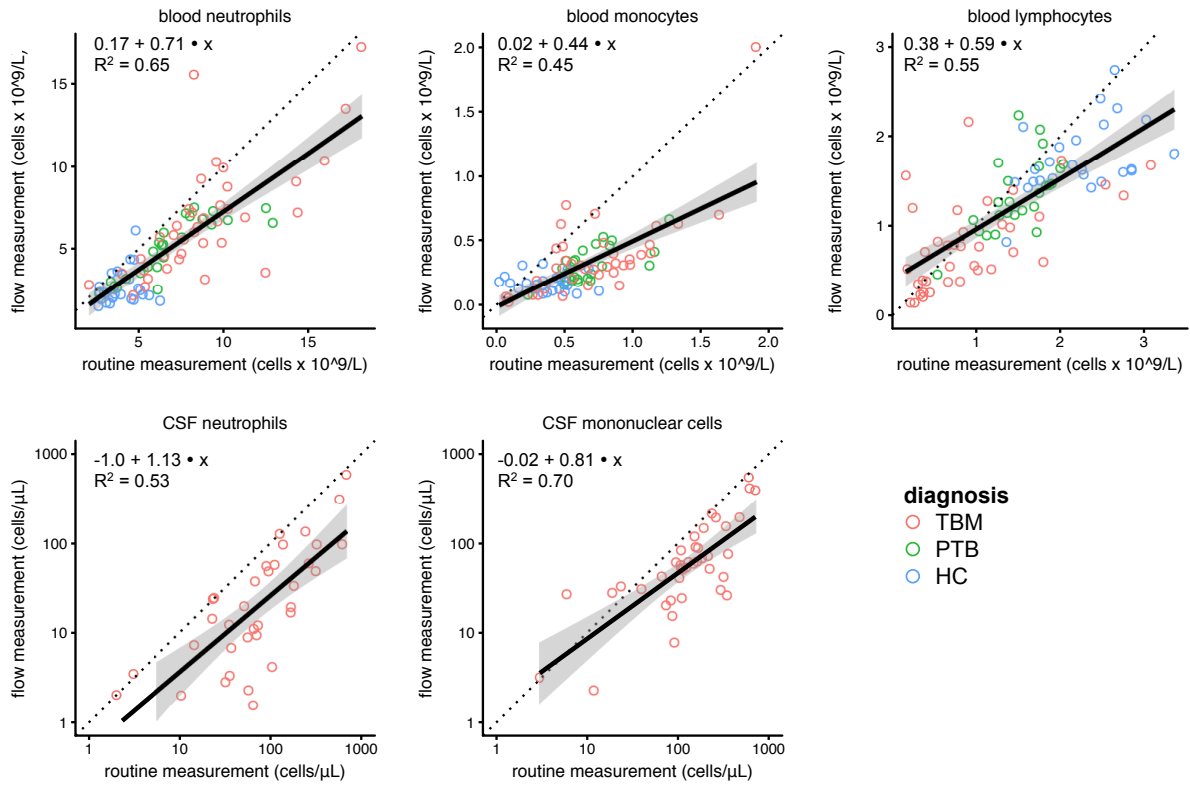

(C) Regression lines with 95% confidence intervals for the correlation between cell counts as measured routinely (x-axis), and with flow cytometry (y-axis) for blood and CSF. Regression formulas and regression coefficients ( $R^2$ ) are printed on the graphs.

Note: CSF cells are plotted on a  $^{10}\log$ -axis and regression coefficients are  $^{10}\log$ -transformed.

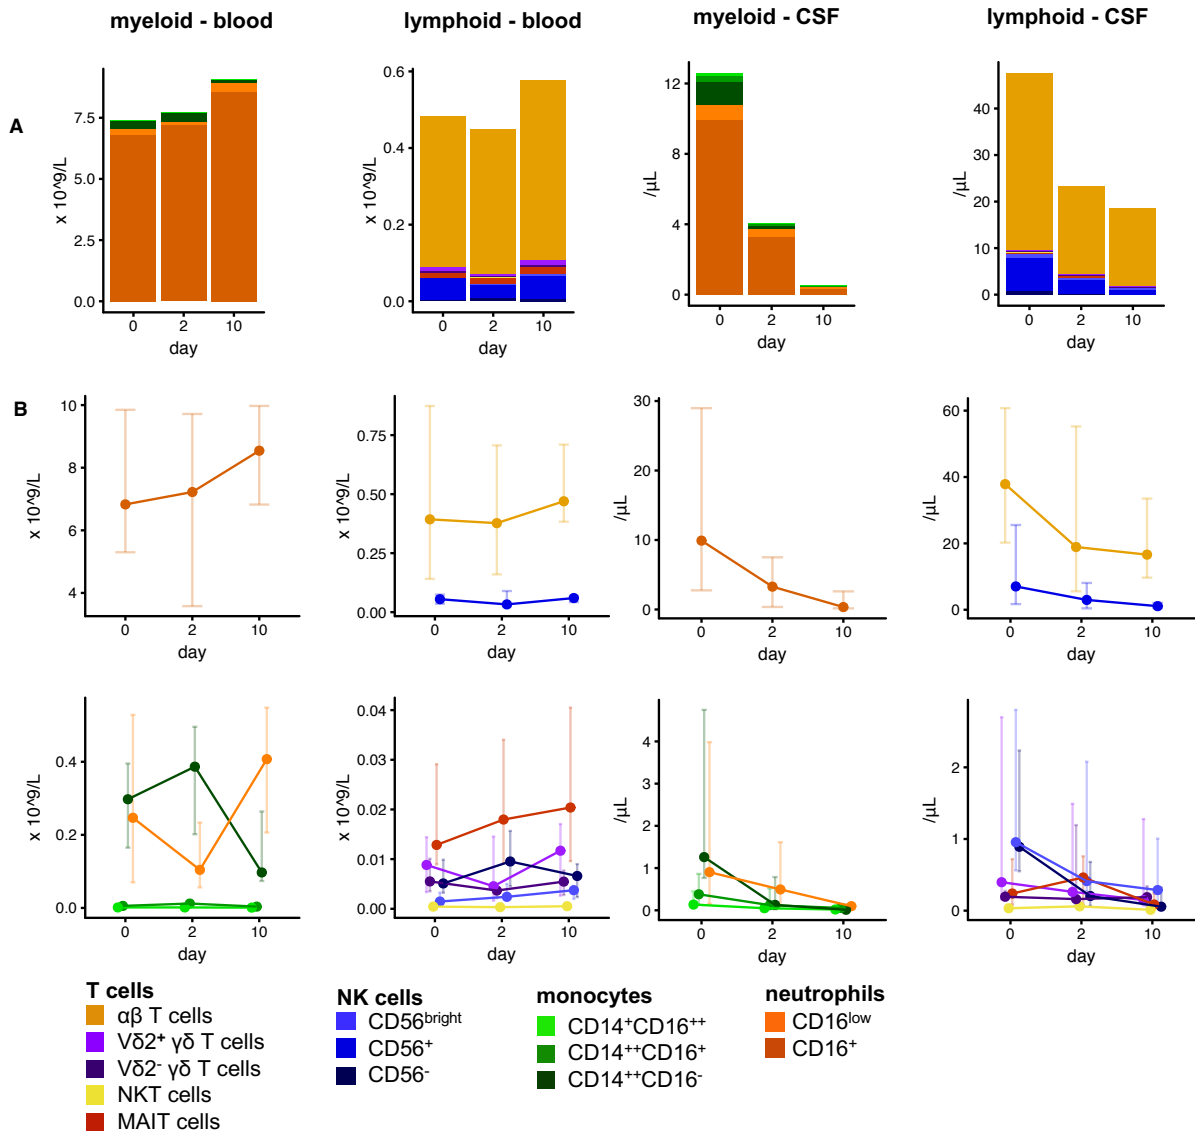

**Supplementary figure 2** Flow cytometry follow-up study results of tuberculous meningitis patients who survived past day 10 (n = 15). Results show median (A) or median with interquartile range (B) for day 0, 2 and 10 for myeloid and lymphoid cell types separately in blood (left) and CSF (right). Note the different y-axis limits. Data is ≥ 80% complete for all time-points for blood and is ≥ 87% complete for CSF.

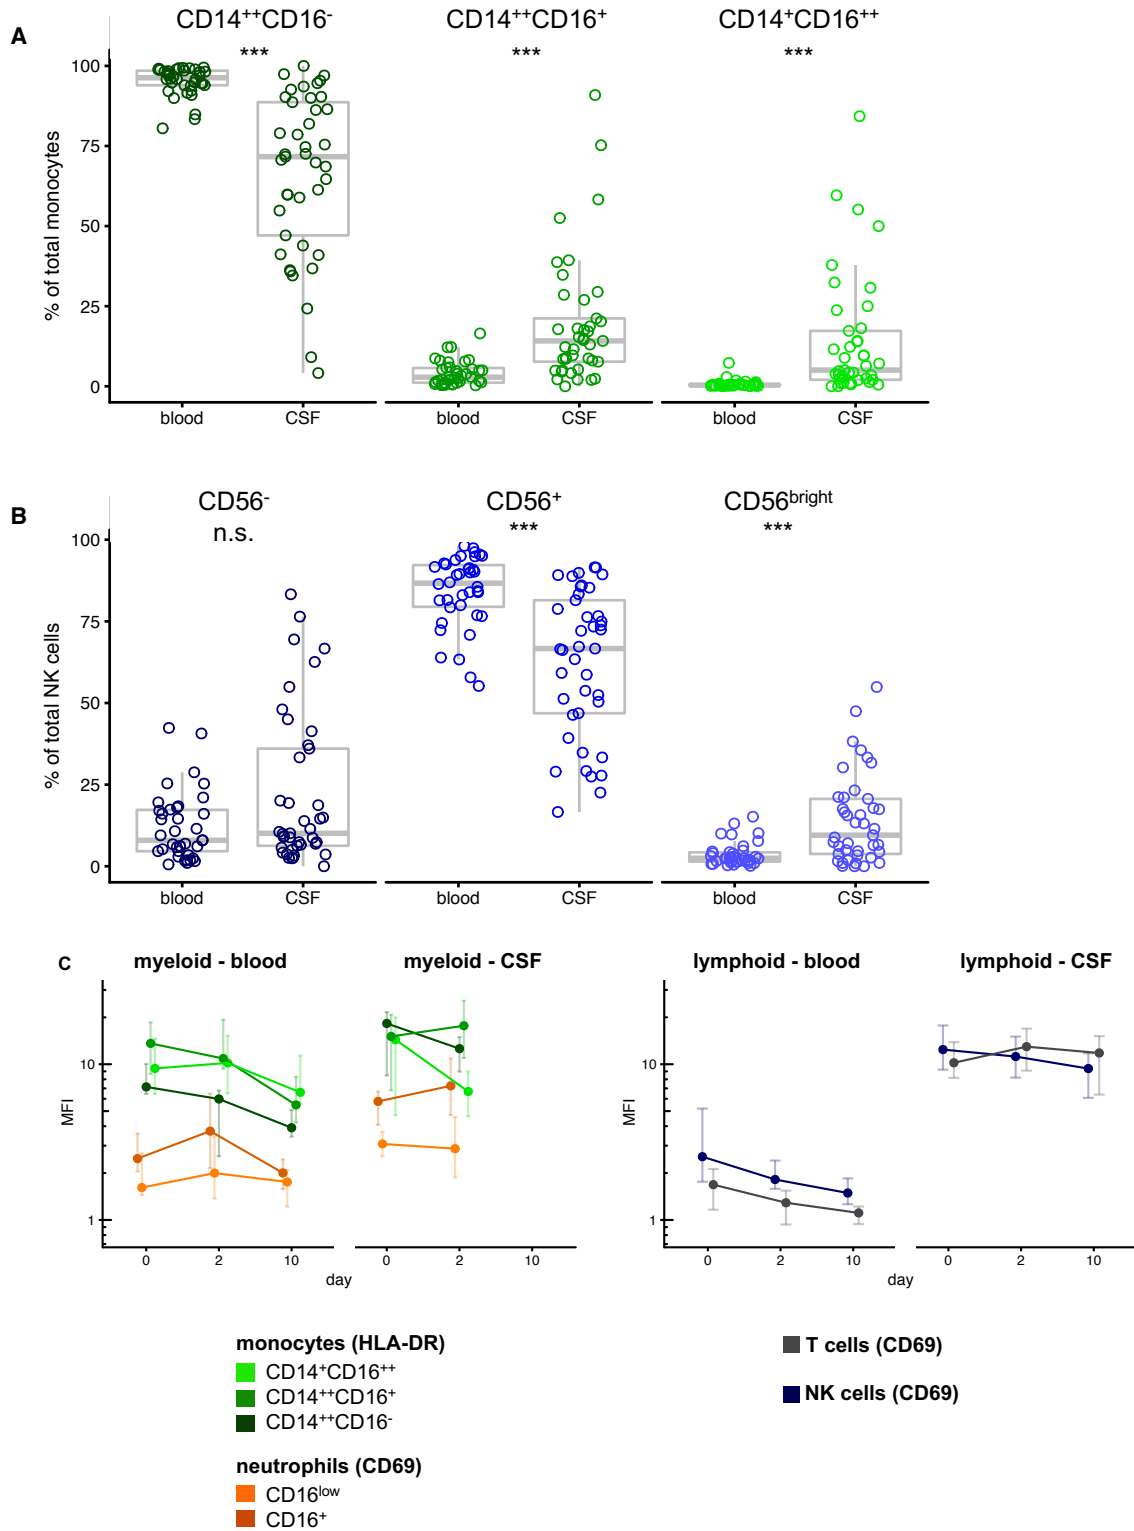

**Supplementary figure 3** Flow cytometry results of proportions of monocyte (A) and NK cell (B) subtypes in blood versus CSF of tuberculous meningitis patients. \*\*\*  $p < 0.001$ . (C) Activation marker expression by indicated cell populations during patient follow-up, all of whom survived past day 10 ( $n = 15$ ). Data is  $\geq 80\%$  complete for all time-points for CSF and blood. Note: day 10 myeloid activation markers in CSF could not reliably be measured because of the low cell counts.

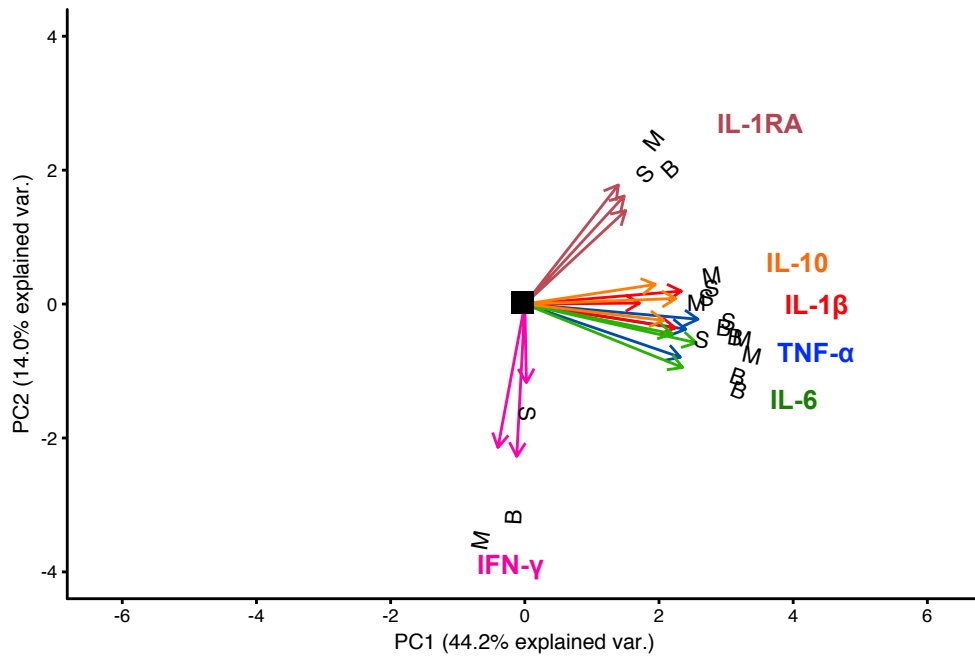

**Supplementary figure 4** (A) Loadings for principal component analysis on ex-vivo cytokine data. B = BCG, M = *M. tuberculosis* and S = *S. pneumoniae*.

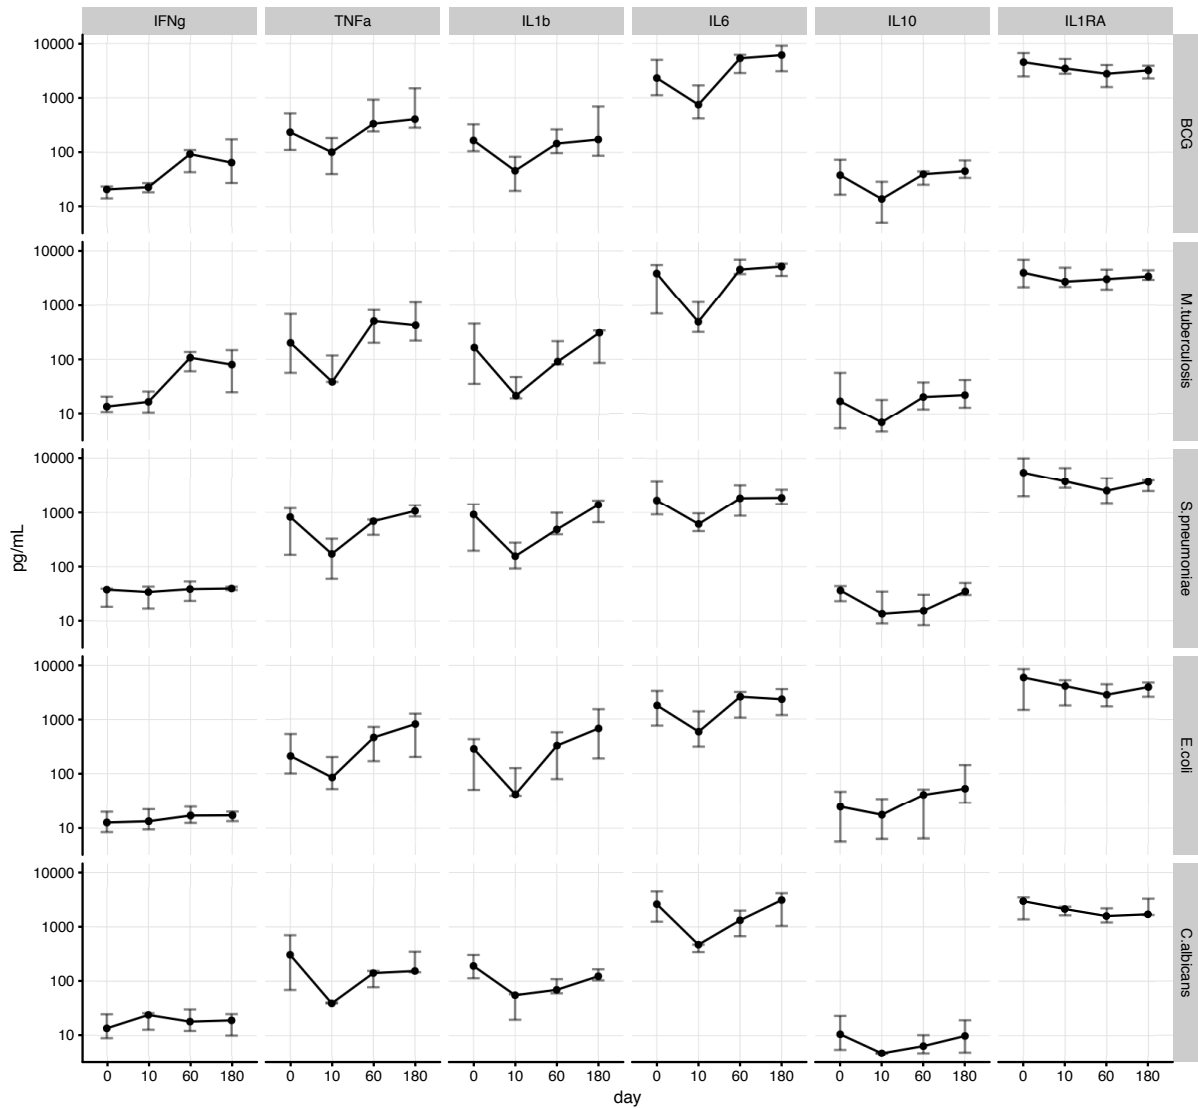

(B) Ex-vivo whole blood cytokine results for tuberculous meningitis patients in the follow-up study who survived past day 180 (n = 15). Results show median with interquartile range for all five stimuli (ordered vertically) for all six measured cytokines (horizontally). Patients were selected who had complete data at day 0 and missed maximally one of the follow-up time-points. Data is 93% complete for day 10, 73% for day 60 and 53% for day 180. Missing data were due to technical errors.



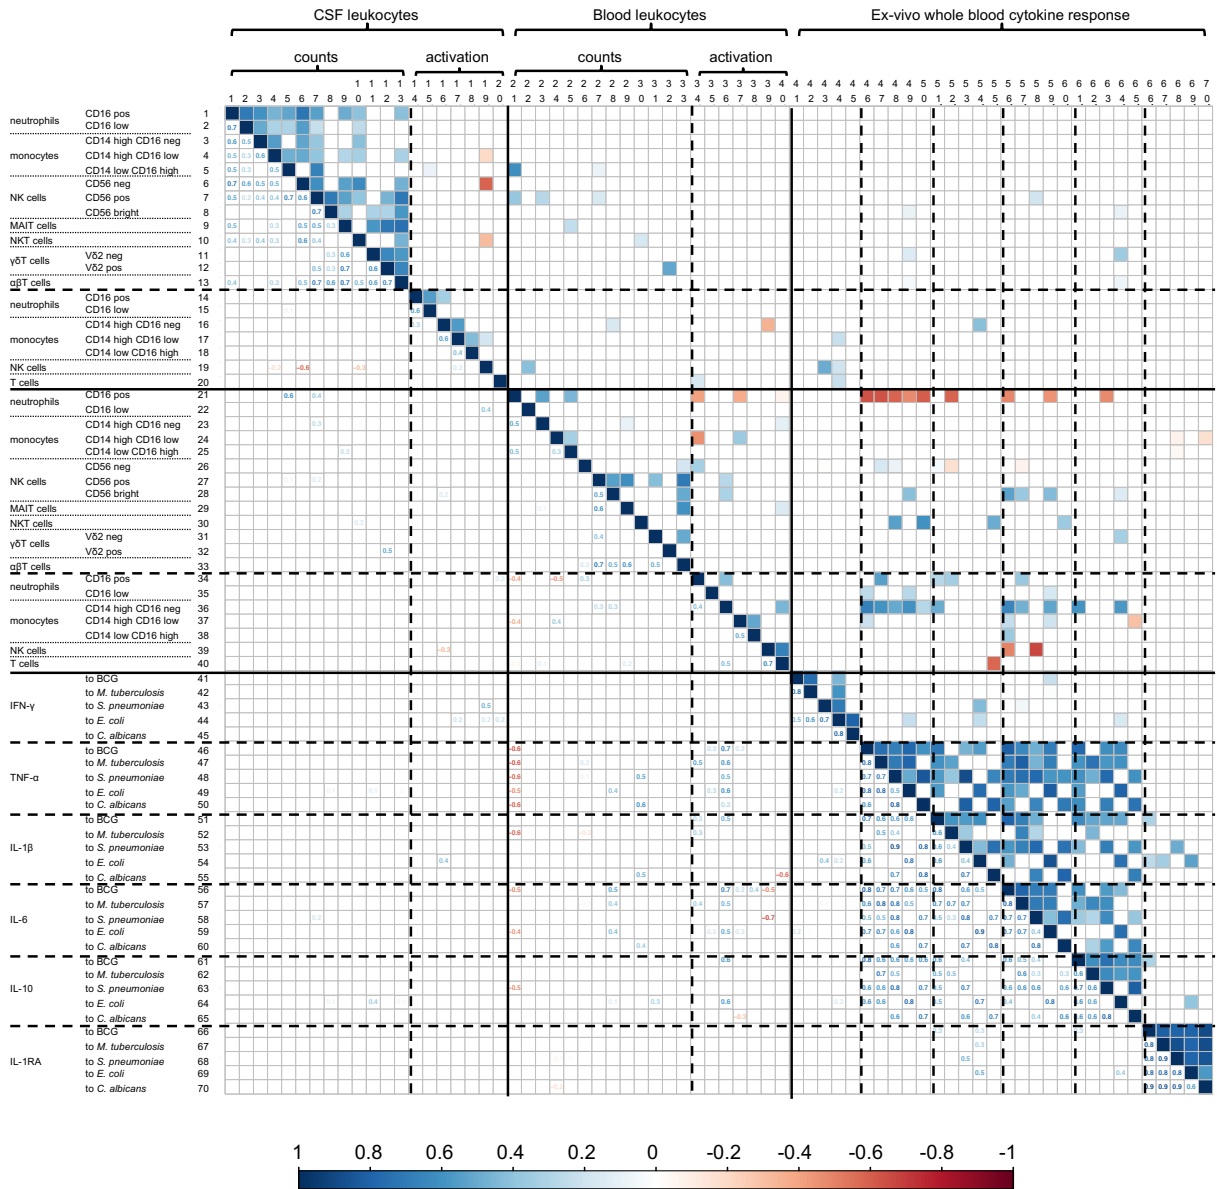

**Supplementary figure 5** Correlation matrix for tuberculous meningitis patient CSF and blood cell counts and activation markers, as well as blood ex-vivo whole blood response using Spearman correlation. Pair-wise complete data was included.

## Supplementary table

**Supplementary table 1:** Clinical, cerebrospinal fluid and blood parameters of tuberculous meningitis patients

| Variable                                   | n/N or median | % or IQR    |
|--------------------------------------------|---------------|-------------|
| <b>Clinical features</b>                   |               |             |
| Sex                                        | 37/67         | (56%)       |
| Age                                        | 27            | (21–38)     |
| Duration of main complaint                 | 4             | (2–7)       |
| Duration of the first neurological symptom | 14            | (7–21)      |
| Tuberculous meningitis grade               |               |             |
| I                                          | 2/67          | (3%)        |
| II                                         | 58/67         | (87%)       |
| III                                        | 7/67          | (10%)       |
| Temperature, °C                            | 37.8          | (37.0–38.2) |
| Glasgow Coma Scale score                   | 13            | (11–14)     |
| Seizures present                           | 1/66          | (2%)        |
| Motor abnormalities present                | 38/66         | (57%)       |
| Cranial nerve palsy present                | 51/66         | (6%)        |
| Abnormal chest radiograph findings         | 50/67         | (75%)       |
| <b>Cerebrospinal fluid</b>                 |               |             |
| CSF to blood glucose ratio                 | 0.14          | (0.09–0.20) |
| Protein, mg/dL                             | 221           | (150–386)   |
| Culture, % positive                        | 46/67         | (69%)       |
| <b>Blood</b>                               |               |             |
| Haemoglobin, g/dL                          | 12.5          | (10.5–13.8) |
| Thrombocytes, x 10 <sup>9</sup> /L         | 298           | (234–379)   |
| <b>Outcomes</b>                            |               |             |
| Length of hospital stay in days            | 21            | (12,23)     |
| Alive at discharge                         | 51/66         | (76%)       |
| Outcome at day 180                         |               |             |
| Alive                                      | 39/71         | (58%)       |
| Deceased                                   | 27/67         | (40%)       |
| Lost to follow-up                          | 1/67          | (2%)        |

Continuous variables are presented as median with interquartile range and categorical variables as number and proportion.

IQR = interquartile range. Additional routine inflammatory markers can be found in Table 1.
